# Supplementary material
Source: Elsevier journal article supplement (https://www.sciencedirect.com/science/article/pii/S1699258X20302436)
Supplement: mmc1 [file S1699258X20302436:mmc1.pdf]

# Encuesta AR 2020. Impacto y control de la Artritis Reumatoide en España.

---

## Instrucciones

Este cuestionario tiene como objetivo conocer el impacto de tu Artritis Reumatoide y el control de la enfermedad que existe actualmente en España. Nos interesa conocer tu opinión.

El cuestionario tiene una duración aproximada de 15 minutos, asegúrate de tener tiempo suficiente antes de iniciar su cumplimentación. Tómate tu tiempo para cumplimentarlo.

La calidad y veracidad de la información es importante. Todos los datos obtenidos de tu respuesta serán manejados de forma anónima y analizados de forma conjunta con los de otros participantes.

Si necesitas hacer algún cambio en los datos cumplimentados, utiliza los botones de Anterior y Siguiente para ir a la pregunta que quieras modificar.

Muchas Gracias.

---

## Preguntas clasificatorias

**¿Qué enfermedad tienes diagnosticada? (*Esta pregunta es obligatoria*) \***

☐ Artritis Reumatoide      ☐ Otras enfermedades reumáticas autoinmunes (descalificar)

**¿Eres residente en España? (*Esta pregunta es obligatoria*) \***

☐ Si      ☐ No (descalificar)

**Por favor indica tu comunidad autónoma de residencia (*Esta pregunta es obligatoria*) \***

*Desplegable Comunidades autónomas*

**Por favor, indica tu fecha de nacimiento (*Esta pregunta es obligatoria*) \***

\_\_ Día      \_\_\_\_ Mes      \_\_\_\_ Año

**¿Puedes indicarnos la fecha (aproximada) de diagnóstico? (*Esta pregunta es obligatoria*) \***

**En caso de duda sobre la fecha exacta, especifica la fecha aproximada de tu diagnóstico.**

*Es importante que no dejes en blanco, y cumplimentes el DÍA, MES Y AÑO, aunque sea una fecha aproximada.*

**Especifica tu SEXO**      ☐ Mujer      ☐ Hombre

**¿Pertenece a alguna asociación de pacientes? (*Esta pregunta es obligatoria*) \***

☐ Si      ☐ No

# Impacto de la Artritis Reumatoide

**1) ¿Cómo calificarías el CONTROL de tu Artritis Reumatoide durante el ÚLTIMO MES? (*Esta pregunta es obligatoria*) \***

( ) Totalmente controlada ( ) Bien controlada ( ) Algo controlada ( ) Nada o mal controlada

**2) Nos interesa saber de qué manera tu enfermedad afecta tus capacidades y habilidades para realizar actividades de la vida diaria. Por favor, marca la respuesta que mejor describa tu capacidad para hacer las cosas o tus habilidades habituales.**

|                                                                                                         | SIN<br>NINGU<br>NA<br>DIFICU<br>LTAD | CON<br>ALGO<br>DE<br>DIFICU<br>LTAD | CON<br>MUCH<br>A<br>DIFICU<br>LTAD | IMPOSIB<br>LE DE<br>HACER |
|---------------------------------------------------------------------------------------------------------|--------------------------------------|-------------------------------------|------------------------------------|---------------------------|
| ¿Vestirte solo(a), incluyendo atarte los cordones de los zapatos, abotonarte y desabotonarte la ropa? * | ↑                                    | ↑                                   | ↑                                  | ↑                         |
| ¿Entrar y salir de la cama? *                                                                           | ↑                                    | ↑                                   | ↑                                  | ↑                         |
| ¿Levantar una taza o un vaso llenos para llevártelos a la boca? *                                       | ↑                                    | ↑                                   | ↑                                  | ↑                         |
| ¿Caminar fuera de tu casa sobre un terreno plano? *                                                     | ↑                                    | ↑                                   | ↑                                  | ↑                         |
| ¿Lavarte y secarte tu cuerpo? *                                                                         | ↑                                    | ↑                                   | ↑                                  | ↑                         |
| ¿Agacharte para levantar ropa del suelo? *                                                              | ↑                                    | ↑                                   | ↑                                  | ↑                         |
| ¿Subir y bajar escaleras? *                                                                             | ↑                                    | ↑                                   | ↑                                  | ↑                         |
| ¿Entrar y salir de un coche? *                                                                          | ↑                                    | ↑                                   | ↑                                  | ↑                         |
| ¿Hacer tareas propias de tu trabajo? *                                                                  | ↑                                    | ↑                                   | ↑                                  | ↑                         |
| ¿Coger o levantar peso? *                                                                               | ↑                                    | ↑                                   | ↑                                  | ↑                         |
| Solo en caso de disponer de carnet, ¿Conducir? (opcional)                                               | ↑                                    | ↑                                   | ↑                                  | ↑                         |

**3) Considerando todas las formas en las que tu artritis o enfermedad te afecta, por favor marca en la línea de abajo lo que mejor describa CÓMO TE SIENTES en este momento. (*Esta pregunta es obligatoria*) \***

Muy bien 0 \_\_\_\_\_ [ ] \_\_\_\_\_ 10 Muy mal

**4) ¿Cómo calificarías el IMPACTO de la Artritis Reumatoide en los siguientes aspectos de tu vida? (Esta pregunta es obligatoria)**

|                                       | Ningún<br>impacto | Un<br>poco | Bastant<br>e | Mucho | Impacto<br>severo |
|---------------------------------------|-------------------|------------|--------------|-------|-------------------|
| A nivel EMOCIONAL *                   | ( )               | ( )        | ( )          | ( )   | ( )               |
| A nivel COGNITIVO *                   | ( )               | ( )        | ( )          | ( )   | ( )               |
| En el ámbito LABORAL o<br>ACADÉMICO * | ( )               | ( )        | ( )          | ( )   | ( )               |
| En el ámbito SOCIAL *                 | ( )               | ( )        | ( )          | ( )   | ( )               |
| A nivel FAMILIAR *                    | ( )               | ( )        | ( )          | ( )   | ( )               |
| En OTROS ámbitos                      | ( )               | ( )        | ( )          | ( )   | ( )               |

**Puedes especificar, en un máximo de 30 palabras, los OTROS ámbitos en que te ha impactado la enfermedad**

---

**5) ¿Tienes alguna persona que te AYUDA en las ACTIVIDADES DEL DÍA A DÍA que no puedes realizar, o en las que realizas con dificultad, debido a tu artritis? (Esta pregunta es obligatoria) \***

( ) Sí    ( ) No

**¿Quién te AYUDA en las ACTIVIDADES DEL DÍA A DÍA? (Esta pregunta es obligatoria) \***

- ( ) Cuidador/a remunerado
- ( ) Familiar
- ( ) Amigo/a
- ( ) Personal de Atención primaria
- ( ) Personal del Hospital
- ( ) Otros (especificar):

**6) ¿En qué medida te preocupa tu futuro con la enfermedad? (Esta pregunta es obligatoria) \***

absolutamente nada preocupado extremadamente preocupado

( ) 0    ( ) 1    ( ) 2    ( ) 3    ( ) 4    ( ) 5    ( ) 6    ( ) 7    ( ) 8    ( ) 9    ( ) 10

## Impacto y gestión de síntomas

**7) De todos los siguientes síntomas, ¿cuál dirías que es el que MÁS IMPACTO ha tenido en tu calidad de vida? (Esta pregunta es obligatoria) \***

*Ordena en ranking de mayor impacto a menor impacto. Asigna 1 al síntoma con mayor impacto, 2 al segundo y así, sucesivamente. No se puede asignar el mismo valor a dos síntomas.*

- \_\_\_\_\_ Fatiga o cansancio
- \_\_\_\_\_ Dolor
- \_\_\_\_\_ Inflamación en las articulaciones
- \_\_\_\_\_ Rigidez matutina
- \_\_\_\_\_ Pérdida de fuerza

**8) ¿Cuánto DOLOR has tenido por tu enfermedad durante el ÚLTIMO MES? Por favor, marca en la línea de abajo cuánto dolor has tenido: (Esta pregunta es obligatoria) \***

Sin ningún dolor 0 \_\_\_\_\_ [ ] \_\_\_\_\_ 10 El peor dolor que se pueda imaginar

**9) Por favor, marca en la línea de abajo el IMPACTO que ha tenido el DOLOR en tu vida durante el ÚLTIMO MES (Esta pregunta es obligatoria) \***

Sin impacto 0 \_\_\_\_\_ [ ] \_\_\_\_\_ 10 Muy difícil de sobrellevar

**10) Por favor, marca en la línea de abajo cómo de bien has MANEJADO o GESTIONADO tu DOLOR durante el ÚLTIMO MES (Esta pregunta es obligatoria) \***

Muy bien 0 \_\_\_\_\_ [ ] \_\_\_\_\_ 10 No muy bien

**¿Qué MEDIDAS has tomado para gestionar tu DOLOR? (Esta pregunta es obligatoria) \***

*Puedes marcar más de una opción*

- ☐ Tomar medicamentos para paliar el dolor
- ☐ Guardar reposo
- ☐ Dejar de hacer ciertas actividades
- ☐ Ir al médico/ enfermería
- ☐ Remedios naturales o caseros
- ☐ Terapia de relajación
- ☐ Realizar ejercicio físico suave
- ☐ Ninguna

**11) Considerando fatiga como la falta de energía, cansancio y motivación para afrontar una tarea o actividad, por favor marca en la línea de abajo cuánta FATIGA has sentido por tu enfermedad durante el ÚLTIMO MES (*Esta pregunta es obligatoria*) \***

Sin ninguna fatiga 0 \_\_\_\_\_ [ ] \_\_\_\_\_ 10 Totalmente fatigado

**12) Por favor, marca en la línea de abajo el IMPACTO que ha tenido la FATIGA en tu vida durante la ÚLTIMO MES (*Esta pregunta es obligatoria*) \***

Sin impacto 0 \_\_\_\_\_ [ ] \_\_\_\_\_ 10 Muy difícil de sobrellevar

**13) Por favor, marca en la línea de abajo cómo de bien has MANEJADO o GESTIONADO tu FATIGA durante el ÚLTIMO MES (*Esta pregunta es obligatoria*) \***

Muy bien 0 \_\_\_\_\_ [ ] \_\_\_\_\_ 10 No muy bien

**¿Qué MEDIDAS has tomado para gestionar tu FATIGA? (*Esta pregunta es obligatoria*) \***

*Puedes marcar más de una opción*

- ☐ Tomar medicamentos
- ☐ Guardar reposo o incrementar horas de sueño
- ☐ Dejar de hacer ciertas actividades
- ☐ Ir al médico/ enfermería
- ☐ Remedios naturales o caseros
- ☐ Ninguna

**14) ¿Has tenido INFLAMACIÓN en alguna de las articulaciones por tu enfermedad durante el ÚLTIMO MES? (*Esta pregunta es obligatoria*) \***

- ☐ Sí
- ☐ No

**15) Por favor, marca en la línea de abajo el IMPACTO que ha tenido la INFLAMACIÓN en tu vida durante la ÚLTIMO MES (*Esta pregunta es obligatoria*) \***

Sin impacto 0 \_\_\_\_\_ [ ] \_\_\_\_\_ 10 Muy difícil de sobrellevar

**16) Por favor, marca en la línea de abajo cómo de bien has MANEJADO o GESTIONADO la INFLAMACIÓN durante el ÚLTIMO MES (*Esta pregunta es obligatoria*) \***

Muy bien 0 \_\_\_\_\_ [ ] \_\_\_\_\_ 10 No muy bien

**¿Qué MEDIDAS has tomado para gestionar la INFLAMACIÓN? (Esta pregunta es obligatoria) \***

*Puedes marcar más de una opción*

- ☐ Tomar medicamentos
- ☐ Guardar reposo
- ☐ Dejar de hacer ciertas actividades
- ☐ Ir al médico/ enfermería
- ☐ Remedios naturales o caseros
- ☐ Realizar ejercicio físico suave
- ☐ Ninguna

**17) ¿Has tenido RIGIDEZ MATUTINA por tu enfermedad durante el ÚLTIMO MES? (Esta pregunta es obligatoria) \***

- ☐ Sí
- ☐ No

**18) Por favor, marca en la línea de abajo el IMPACTO que ha tenido la RIGIDEZ MATUTINA en tu vida durante la ÚLTIMO MES (Esta pregunta es obligatoria) \***

Sin impacto 0 \_\_\_\_\_ [ ] \_\_\_\_\_ 10 Muy difícil de sobrellevar

**19) Por favor, marca en la línea de abajo cómo de bien has MANEJADO o GESTIONADO la RIGIDEZ MATUTINA durante el ÚLTIMO MES (Esta pregunta es obligatoria) \***

Muy bien 0 \_\_\_\_\_ [ ] \_\_\_\_\_ 10 No muy bien

**¿Qué MEDIDAS has tomado para gestionar la RIGIDEZ MATUTINA? (Esta pregunta es obligatoria) \***

*Puedes marcar más de una opción*

- ☐ Tomar medicamentos
  - ☐ Guardar reposo
  - ☐ Dejar de hacer ciertas actividades
  - ☐ Ir al médico/ enfermería
  - ☐ Remedios naturales o caseros
  - ☐ Ninguna
-

# Tratamiento Actual

20) En la ACTUALIDAD, ¿Estás tomando algún TRATAMIENTO para la ARTRITIS REUMATOIDE? (Esta pregunta es obligatoria) \*

( ) Sí    ( ) No

---

## Tratamiento actual

21) Por favor, indica ¿qué TRATAMIENTOS estás tomando ACTUALMENTE para la ARTRITIS REUMATOIDE? (Recuerda marcar "Si" o "No" para cada caso).

Una o varias de las siguientes opciones deben marcarse con un SI. Marca con un NO los tratamientos que no estés tomando actualmente.

|                                                                                                                                                 | SI  | NO  |
|-------------------------------------------------------------------------------------------------------------------------------------------------|-----|-----|
| Analgésicos/Antiinflamatorios (como por ejemplo ibuprofeno o paracetamol)                                                                       | ( ) | ( ) |
| Corticoides (como por ejemplo hidrocortisona o urbasón)                                                                                         | ( ) | ( ) |
| DMARDs o FAMEs CONVENCIONALES (como por ejemplo Metotrexato, Metoject, Arava, Dolquine o Imurel)                                                | ( ) | ( ) |
| Terapias Biológicas incluyendo biosimilares (como por ejemplo Humira/Hyrimoz, Enbrel/Benepali, Roactemra, Remicade/Inflectra, Mabthera/Truxima) | ( ) | ( ) |
| Inhibidores del JAK orales (Olumiant, Xeljanz)                                                                                                  | ( ) | ( ) |
| Otros                                                                                                                                           | ( ) | ( ) |

---

## Experiencia tratamiento actual

**Indica del siguiente listado, ¿qué inhibidores de la JAK estás tomando ACTUALMENTE?\***

- ☐ Olumiant (Baricitinib)
- ☐ Xeljanz (tofacitinib)

**Indica del siguiente listado, ¿qué terapias biológicas estás tomando ACTUALMENTE?\***

- ☐ Cimzia (certolizumab)
- ☐ Humira (adalimumab)
- ☐ Mabthera (rituximab)
- ☐ Inflectra (infliximab biosimilar)
- ☐ Enbrel (etanercept)
- ☐ Remicade (infliximab)
- ☐ Actemra (tocilizumab)
- ☐ Remsima (infliximab biosimilar)
- ☐ Orencia (abatacept)
- ☐ Simponi (golimumab)
- ☐ Flixabi (infliximab biosimilar)
- ☐ Truxima (rituximab biosimilar)
- ☐ Benepali (etanercept biosimilar)
- ☐ Erelzi (etanercept biosimilar)
- ☐ Amgevita (adalimumab biosimilar)
- ☐ Kevzara (sarilumab)
- ☐ Rixathon (rituximab biosimilar)
- ☐ Imraldi (adalimumab biosimilar)
- ☐ Hyrimoz (adalimumab biosimilar)

**22) En general, ¿cómo de SATISFECHO estás con tu tratamiento ACTUAL? (*Esta pregunta es obligatoria*) \***

- ☐ Nada satisfecho
- ☐ Un poco satisfecho
- ☐ Moderadamente satisfecho
- ☐ Muy satisfecho
- ☐ Completamente satisfecho



**23) ¿Sientes que necesitas tomar el tratamiento, para aliviar los síntomas, días antes de la fecha en la que te corresponde? (Esta pregunta es obligatoria) \***

☐ Sí    ☐ No

**24) En general, en tu día a día, ¿estás tomando medicamentos para OTRAS ENFERMEDADES CRÓNICAS además de la Artritis Reumatoide? (Esta pregunta es obligatoria) \***

*Debes considerar cualquier enfermedad crónica diagnosticada, tipo hipertensión, diabetes, otra enfermedad autoinmune, etc*

☐ Sí    ☐ No

**¿Cuántas PASTILLAS o COMPRIMIDOS tomas en TOTAL AL DÍA para las otras enfermedades crónicas? (Esta pregunta es obligatoria) \***

*La respuesta debe ser un número no mayor de 2 dígitos, es decir, un número contenido entre 1 y 99*  
\_\_\_\_ número de pastillas al día

**25) ¿Utilizas algún SISTEMA DE RECORDATORIO para la toma o administración de tu tratamiento? (Esta pregunta es obligatoria) \***

☐ Sí    ☐ No

**¿Qué SISTEMA DE RECORDATORIO utilizas para la toma o administración de tu tratamiento? (Esta pregunta es obligatoria) \***

*Puedes marcar más de una respuesta.*

☐ Alarma

☐ Aplicación de móvil

☐ Programa de Soporte a Pacientes con call-center, email o sms

☐ Otros (especificar): \_\_\_\_\_

**¿Te resulta ÚTIL el SISTEMA de RECORDATORIO que utilizas actualmente? (Esta pregunta es obligatoria) \***

☐ Sí    ☐ No

**26) ¿Hasta qué punto consideras un INCONVENIENTE para el CUMPLIMIENTO tener que tomar varios tratamientos? (Esta pregunta es obligatoria) \***

- ☐ Ningún inconveniente
- ☐ Muy poco inconveniente
- ☐ Bastante inconveniente
- ☐ Un inconveniente importante
- ☐ Un gran inconveniente

**27) ¿Qué opciones terapéuticas CONOCES para tratar tu ARTRITIS REUMATOIDE? (Esta pregunta es obligatoria) \***

- ☐ Terapias biológicas
- ☐ Inhibidores de la JAK orales
- ☐ FAMES convencionales
- ☐ Corticoides
- ☐ Ninguna de las anteriores

**¿Cómo has LLEGADO A CONOCER las distintas opciones terapéuticas? (Esta pregunta es obligatoria) \***

- ☐ Por experiencia propia
- ☐ Explicadas por mi especialista
- ☐ Explicadas por enfermería
- ☐ Por mi Asociación de pacientes
- ☐ Por fuentes o medios de comunicación
- ☐ Otros - especifica: \_\_\_\_\_

**28) En general, con respecto a tu tratamiento, ¿Cuáles son los posibles INCONVENIENTES que TE PREOCUPAN MÁS? Selecciona los 3 INCONVENIENTES que MÁS TE PREOCUPAN. (Esta pregunta es obligatoria) \***

*Sólo puedes marcar 3 de los 7 atributos de la lista. Marca aquellos que más te preocupan.*

- ☐ Tener que pincharme (vía de administración)
- ☐ Efectos adversos a largo plazo
- ☐ Olvidar de tomármela
- ☐ Tener que transportarla, conservarla o desecharla
- ☐ Que me siente mal cuando la tomo
- ☐ Que no controle los síntomas como dolor, rigidez, inflamación o fatiga
- ☐ Que no frene la progresión de la enfermedad

**29) En general, con respecto a tu tratamiento, ¿cuáles son las VENTAJAS que TE IMPORTAN MÁS? Selecciona las 3 VENTAJAS que MÁS TE IMPORTAN. (Esta pregunta es obligatoria) \***

*Sólo puedes marcar 3 de los 8 atributos de la lista. Marca aquellos que más te importan.*

- ☐ Efectividad
- ☐ Que controle la enfermedad
- ☐ Que tenga pocos efectos secundarios
- ☐ Que sea cómoda de administrar
- ☐ Que disminuya el dolor en articulaciones
- ☐ Que reduzca la inflamación
- ☐ Que mejore la calidad de vida
- ☐ Que reduzca el número de brotes

**30) Indica tu PREFERENCIA sobre la FORMA de ADMINISTRAR tu terapia para la Artritis Reumatoide (Esta pregunta es obligatoria) \***

- ☐ Oral una vez a la semana
- ☐ Oral una o varias veces al día
- ☐ Inyección subcutánea diaria
- ☐ Inyección subcutánea semanal
- ☐ Inyección subcutánea quincenal
- ☐ Inyección subcutánea mensual
- ☐ Infusión intravenosa en hospital

**31) ¿SIGUES LAS PAUTAS de administración marcadas por tu médico? (Esta pregunta es obligatoria) \***

- ☐ Siempre    ☐ A veces    ☐ Nunca

**Puedes explicar el MOTIVO por el que no sigues las pautas de administración**

---

## Experiencia con Metotrexato

**32) ¿Estás en tratamiento ACTUALMENTE con METOTREXATO en cualquiera de sus formas (oral o inyectable en vial, precargado, pluma,...)? (Esta pregunta es obligatoria) \***

- ☐ Sí            ☐ No, pero lo tomé en el pasado    ☐ No, no lo he tomado nunca

**33) ¿Hasta qué punto PREFERIRÍAS DEJAR DE TOMAR METOTREXATO para el tratamiento de tu enfermedad? (Esta pregunta es obligatoria) \***

Preferiría dejarlo hoy    ☐ 1    ☐ 2    ☐ 3    ☐ 4    ☐ 5    Preferiría no dejarlo nunca

**34) ¿SIGUES LAS PAUTAS de administración para METOTREXATO marcadas por tu médico? (Esta pregunta es obligatoria) \***

☐ Siempre    ☐ A veces    ☐ Nunca

**Por favor, puedes explicar por qué MOTIVO/S NO SIGUES las pautas de administración con METOTREXATO \***

*Puedes marcar más de una respuesta.*

- ☐ Tomo demasiada medicación
- ☐ Efectos no deseados
- ☐ Se me olvida
- ☐ Descanso terapéutico
- ☐ Tener que pincharme
- ☐ Me siento mal cuando la tomo
- ☐ Otros - especificar: \_\_\_\_\_

**Por favor, indica el MOTIVO por el que te RETIRARON el METOTREXATO (Esta pregunta es obligatoria) \***

- ☐ Falta de eficacia
- ☐ Efectos secundarios
- ☐ Otros: \_\_\_\_\_

**35) ¿SEGUÍAS LAS PAUTAS de administración para METOTREXATO marcadas por tu médico? (Esta pregunta es obligatoria) \***

☐ Siempre    ☐ A veces    ☐ Nunca

**Por favor, puedes explicar por qué MOTIVO/S NO SEGUÍAS las pautas de administración con METOTREXATO \***

*Puedes marcar más de una respuesta.*

- ☐ Tomaba demasiada medicación
- ☐ Efectos no deseados
- ☐ Se me olvidaba
- ☐ Descansos terapéuticos
- ☐ Tener que pincharme
- ☐ Me sentaba mal cuando lo tomaba
- ☐ Otros - especificar: \_\_\_\_\_

**36) ¿En QUÉ ÁMBITOS consideras que estar en tratamiento con METOTREXATO HA AFECTADO o AFECTÓ a tu VIDA DIARIA? (Esta pregunta es obligatoria) \***

- ☐ Relaciones sexuales
- ☐ Ámbito laboral o académico

☐ Relaciones sociales u ocio

☐ Viajes

☐ Ámbito emocional

☐ Otros (especificar): \_\_\_\_\_

☐ Ningún ámbito

**37) ¿Hasta qué punto consideras que los efectos no deseados o molestias con el METOTREXATO DIFICULTAN EL CUMPLIMIENTO? (Esta pregunta es obligatoria) \***

☐ Ninguna dificultad

☐ Muy poca dificultad

☐ Alguna dificultad

☐ Una importante dificultad

☐ Una gran dificultad

---

## Relación con tu médico

**38) Como paciente, ¿te marcas OBJETIVOS de tratamiento y enfermedad? (Esta pregunta es obligatoria) \***

☐ Sí

☐ No

**¿Coinciden tus objetivos con los de tu médico especialista? (Esta pregunta es obligatoria) \***

☐ Sí

☐ No

**39) ¿Le has planteado alguna vez a tu médico especialista la necesidad de un CAMBIO DE TRATAMIENTO?\***

☐ Sí

☐ No

**40) ¿Te PREGUNTA tu médico por CÓMO TE LIMITA la enfermedad en el día a día? (Esta pregunta es obligatoria) \***

☐ Sí

☐ No

**41) ¿Te PREGUNTA TU MÉDICO por signos y síntomas que pueden estar asociados a tu Artritis Reumatoide? (Esta pregunta es obligatoria) \***

*Indica con un Si/No si tu médico te ha preguntado. Todas las opciones deben marcarse con un Si o No. No dejes ninguna sin contestar.*

|                              | Si  | No  |
|------------------------------|-----|-----|
| Dolor                        | ( ) | ( ) |
| Fatiga o Cansancio           | ( ) | ( ) |
| Rigidez matutina             | ( ) | ( ) |
| Estado emocional             | ( ) | ( ) |
| Afectación en la vida diaria | ( ) | ( ) |

**42) ¿Comentas a tu especialista OTROS PROBLEMAS DE SALUD que impactan en tu vida, aun sin saber si tienen relación directa con tu AR? \***

- ( ) Sí  
( ) No

**43) ¿Te ha hablado alguna vez tu médico de la REMISIÓN? (Esta pregunta es obligatoria) \***

- ( ) Sí  
( ) No

**44) ¿Entiendes lo que SIGNIFICA la REMISIÓN? (Esta pregunta es obligatoria) \***

- ( ) Sí  
( ) No

**45) De las siguientes afirmaciones, ¿cuáles consideras que significan REMISIÓN? (Esta pregunta es obligatoria) \***

*Elige la opción que mejor explique remisión para ti.*

- ( ) Curación  
( ) Desaparición de síntomas gracias a la medicación  
( ) Desaparición de síntomas (dolor, inflamación, rigidez,...)  
( ) Poder hacer las mismas actividades que antes de tener la enfermedad

**46) ¿Cómo calificarías el NIVEL DE ENTENDIMIENTO que tienes con el médico especialista que te sigue? (Esta pregunta es obligatoria) \***

Muy malo    ☐ 1    ☐ 2    ☐ 3    ☐ 4    ☐ 5    Muy bueno

**¿Te gustaría MEJORAR EL ENTENDIMIENTO con tu medico en consulta? (Esta pregunta es obligatoria) \***

☐ Sí

☐ No

**47) ¿Consensúas con tu médico las decisiones respecto a tu tratamiento? (Esta pregunta es obligatoria) \***

☐ Sí

☐ No

**¿Te gustaría que consensuará las decisiones respecto a tu tratamiento? (Esta pregunta es obligatoria) \***

☐ Sí

☐ No

**48) ¿Recibes ASISTENCIA por parte de la ENFERMERÍA del Servicio en tu hospital? (Esta pregunta es obligatoria) \***

☐ Sí

☐ No

**Indica, ¿qué TIPO DE ASISTENCIA recibes por parte de ENFERMERÍA? (Esta pregunta es obligatoria) \***

*Puedes marcar más de una respuesta.*

☐ Dudas y consultas acerca de efectos no deseados o contraindicaciones del tratamiento

☐ Formación o información sobre la administración del tratamiento

☐ Consultas de la enfermedad

☐ Dudas de mis hábitos del día a día

☐ Otro tipo de asistencia o soporte: \_\_\_\_\_

**¿Como valorarías la SATISFACCIÓN con la ASISTENCIA de ENFERMERÍA, siendo 0 la valoración mínima y 10 la máxima? (*Esta pregunta es obligatoria*) \***

Completamente insatisfecho

Completamente satisfecho

☐ 0    ☐ 1    ☐ 2    ☐ 3    ☐ 4    ☐ 5    ☐ 6    ☐ 7    ☐ 8    ☐ 9    ☐ 10

**49) ¿Con quién tienes MÁS CONFIANZA a la hora de PREGUNTAR DUDAS sobre tu TRATAMIENTO? (*Esta pregunta es obligatoria*) \***

*Solo puedes marcar una opción. Selecciona con quien tienes MÁS confianza.*

☐ Médico especialista

☐ Enfermera del hospital

☐ Médico de atención primaria

☐ Enfermera de primaria

☐ Otros (especifica - obligatorio): \_\_\_\_\_ \*
